# Supplementary material for: Arsenic Cancer Risk Confounder in Southwest Taiwan Data Set
Source: PubMed Central journal article supplement (PMC1513326; doi:10.1289/ehp.8704), 2006-01-13
Supplement: ehp0114-001077s1.pdf [file ehp0114-001077s1.pdf]

Supplemental Data

Below is a corrected version of a table originally published by the National Academy Press [National Research Council, 1999. Internal Cancer Data from Arsenic-Exposure Studies in Taiwan Region Endemic to Blackfoot Disease. Addendum to Chapter 10. Table A 10-1. In: Arsenic in Drinking Water. Washington, DC: National Academy Press, 308-309]. The original publication had the data for lung and liver cancers transposed and had incorrect data for female lung cancers in villages 4-D, 3-M, and 2-N and for male person-years in villages 4-E, 5-G, and 3-J. Village numbers and totals have been added.

**Table A 10-1 Internal Cancer Data from Arsenic-Exposure Studies Conducted in Taiwan Region Endemic to Blackfoot Disease**

| Village | Number of Wells | Arsenic Concentration, ppm | Median                                                                                                                                                                                                                                                                                                                                  | Person-Years |         | Bladder |    | Lung |     | Liver |     |    |
|---------|-----------------|----------------------------|-----------------------------------------------------------------------------------------------------------------------------------------------------------------------------------------------------------------------------------------------------------------------------------------------------------------------------------------|--------------|---------|---------|----|------|-----|-------|-----|----|
|         |                 |                            |                                                                                                                                                                                                                                                                                                                                         | M            | F       | M       | F  | M    | F   | M     | F   |    |
| 1       | 3-H             | 1                          | 0.010                                                                                                                                                                                                                                                                                                                                   | 0.010        | 4,159   | 4,043   | 1  | 6    | 3   | 5     | 3   | 1  |
| 2       | 2-I             | 1                          | 0.011                                                                                                                                                                                                                                                                                                                                   | 0.011        | 3,529   | 3,194   | 0  | 0    | 0   | 1     | 0   | 0  |
| 3       | 0-G             | 5                          | 0.010, 0.010, 0.030, 0.259, 0.770                                                                                                                                                                                                                                                                                                       | 0.030        | 5,388   | 4,861   | 3  | 2    | 4   | 5     | 3   | 3  |
| 4       | 3-5             | 1                          | 0.032                                                                                                                                                                                                                                                                                                                                   | 0.032        | 7,851   | 7,033   | 3  | 3    | 6   | 2     | 5   | 2  |
| 5       | 3-N             | 1                          | 0.032                                                                                                                                                                                                                                                                                                                                   | 0.032        | 2,689   | 2,392   | 4  | 3    | 3   | 1     | 1   | 1  |
| 6       | 4-7             | 1                          | 0.042                                                                                                                                                                                                                                                                                                                                   | 0.042        | 10,629  | 10,227  | 0  | 0    | 0   | 0     | 4   | 0  |
| 7       | 6-A             | 1                          | 0.045                                                                                                                                                                                                                                                                                                                                   | 0.045        | 7,716   | 6,820   | 0  | 0    | 0   | 0     | 1   | 1  |
| 8       | 0-J             | 2                          | 0.020, 0.080                                                                                                                                                                                                                                                                                                                            | 0.050        | 6,501   | 5,888   | 1  | 0    | 0   | 0     | 2   | 2  |
| 9       | 3-L             | 2                          | 0.053, 0.058                                                                                                                                                                                                                                                                                                                            | 0.056        | 6,238   | 5,094   | 3  | 4    | 5   | 7     | 3   | 0  |
| 10      | 4-D             | 1                          | 0.060                                                                                                                                                                                                                                                                                                                                   | 0.060        | 10,107  | 9,227   | 1  | 2    | 1   | 1     | 1   | 1  |
| 11      | 3-P             | 1                          | 0.065                                                                                                                                                                                                                                                                                                                                   | 0.065        | 6,574   | 5,927   | 0  | 0    | 2   | 5     | 3   | 0  |
| 12      | 6-C             | 1                          | 0.073                                                                                                                                                                                                                                                                                                                                   | 0.073        | 12,767  | 11,937  | 0  | 1    | 2   | 0     | 2   | 0  |
| 13      | 4-8             | 1                          | 0.080                                                                                                                                                                                                                                                                                                                                   | 0.080        | 11,307  | 10,332  | 1  | 0    | 2   | 2     | 3   | 1  |
| 14      | O-O             | 1                          | 0.100                                                                                                                                                                                                                                                                                                                                   | 0.100        | 6,895   | 6,392   | 0  | 0    | 3   | 1     | 2   | 2  |
| 15      | O-E             | 5                          | 0.010, 0.085, 0.110, 0.288, 0.686                                                                                                                                                                                                                                                                                                       | 0.110        | 5,753   | 5,310   | 6  | 3    | 4   | 5     | 3   | 1  |
| 16      | O-I             | 7                          | 0.020, 0.050, 0.110, 0.110, 0.190, 0.580, 0.590                                                                                                                                                                                                                                                                                         | 0.110        | 4,249   | 3,833   | 0  | 2    | 3   | 2     | 1   | 3  |
| 17      | 4-N             | 2                          | 0.073, 0.172                                                                                                                                                                                                                                                                                                                            | 0.123        | 4,709   | 4,291   | 0  | 0    | 1   | 2     | 3   | 1  |
| 18      | 4-J             | 1                          | 0.126                                                                                                                                                                                                                                                                                                                                   | 0.126        | 6,508   | 6,026   | 0  | 1    | 2   | 2     | 6   | 1  |
| 19      | 2-D             | 1                          | 0.256                                                                                                                                                                                                                                                                                                                                   | 0.256        | 9,702   | 8,869   | 0  | 2    | 7   | 1     | 2   | 1  |
| 20      | O-D             | 1                          | 0.256                                                                                                                                                                                                                                                                                                                                   | 0.256        | 3,872   | 3,412   | 1  | 3    | 5   | 2     | 2   | 3  |
| 21      | 3-Q             | 6                          | 0.148, 0.198, 0.242, 0.276, 0.291, 0.458                                                                                                                                                                                                                                                                                                | 0.259        | 5,580   | 5,079   | 2  | 0    | 5   | 4     | 4   | 2  |
| 22      | 4-M             | 1                          | 0.307                                                                                                                                                                                                                                                                                                                                   | 0.307        | 2,953   | 2,758   | 1  | 0    | 2   | 3     | 0   | 0  |
| 23      | 6-6             | 1                          | 0.307                                                                                                                                                                                                                                                                                                                                   | 0.307        | 5,364   | 4,505   | 3  | 0    | 4   | 1     | 3   | 1  |
| 24      | 4-E             | 2                          | 0.340, 0.360                                                                                                                                                                                                                                                                                                                            | 0.350        | 3,912   | 3,586   | 0  | 0    | 0   | 1     | 1   | 0  |
| 25      | 4-L             | 2                          | 0.310, 0.485                                                                                                                                                                                                                                                                                                                            | 0.398        | 3,069   | 2,723   | 1  | 1    | 0   | 1     | 1   | 0  |
| 26      | 4-F             | 11                         | 0.120, 0.170, 0.229, 0.260, 0.260, 0.406, 0.469, 0.485, 0.595, 0.779, 0.819                                                                                                                                                                                                                                                             | 0.406        | 4,482   | 3,886   | 2  | 3    | 5   | 1     | 1   | 0  |
| 27      | 3-I             | 1                          | 0.448                                                                                                                                                                                                                                                                                                                                   | 0.448        | 4,551   | 4,259   | 2  | 3    | 4   | 3     | 5   | 1  |
| 28      | 5-G             | 1                          | 0.467                                                                                                                                                                                                                                                                                                                                   | 0.467        | 6,179   | 5,298   | 7  | 5    | 7   | 1     | 2   | 3  |
| 29      | 4-P             | 1                          | 0.504                                                                                                                                                                                                                                                                                                                                   | 0.504        | 5,843   | 5,397   | 1  | 0    | 1   | 1     | 1   | 1  |
| 30      | 0-H             | 5                          | 0.050, 0.394, 0.520, 0.610, 1.752                                                                                                                                                                                                                                                                                                       | 0.520        | 4,390   | 4,313   | 3  | 2    | 4   | 5     | 4   | 0  |
| 31      | 4-I             | 47                         | 0.020, 0.020, 0.030, 0.090, 0.100, 0.110, 0.120, 0.120, 0.160, 0.190, 0.230, 0.240, 0.250, 0.270, 0.270, 0.290, 0.290, 0.350, 0.370, 0.410, 0.430, 0.450, 0.510, 0.520, 0.540, 0.560, 0.660, 0.700, 0.730, 0.740, 0.760, 0.760, 0.760, 0.780, 0.810, 0.810, 0.840, 0.840, 0.850, 0.850, 0.850, 0.870, 0.890, 0.900, 0.930, 0.940, 0.970 | 0.520        | 4,870   | 4,432   | 2  | 2    | 3   | 5     | 1   | 0  |
| 32      | 3-J             | 2                          | 0.529, 0.529                                                                                                                                                                                                                                                                                                                            | 0.529        | 9,454   | 8,689   | 4  | 8    | 6   | 5     | 3   | 1  |
| 33      | 3-S             | 2                          | 0.480, 0.595                                                                                                                                                                                                                                                                                                                            | 0.538        | 4,287   | 3,667   | 4  | 3    | 8   | 4     | 7   | 0  |
| 34      | 3-9             | 1                          | 0.544                                                                                                                                                                                                                                                                                                                                   | 0.544        | 3,655   | 3,413   | 0  | 1    | 1   | 0     | 1   | 1  |
| 35      | 2-2             | 10                         | 0.560, 0.580, 0.580, 0.590, 0.597, 0.600, 0.618, 0.620, 0.650, 0.704                                                                                                                                                                                                                                                                    | 0.599        | 9,059   | 7,977   | 2  | 2    | 8   | 5     | 9   | 5  |
| 36      | 4-G             | 2                          | 0.620, 0.680                                                                                                                                                                                                                                                                                                                            | 0.650        | 2,425   | 2,108   | 2  | 0    | 2   | 2     | 0   | 0  |
| 37      | 5-4             | 2                          | 0.630, 0.735                                                                                                                                                                                                                                                                                                                            | 0.683        | 3,155   | 2,983   | 1  | 1    | 5   | 2     | 2   | 1  |
| 38      | 2-M             | 2                          | 0.435, 0.950                                                                                                                                                                                                                                                                                                                            | 0.693        | 11,123  | 11,263  | 9  | 9    | 14  | 4     | 6   | 4  |
| 39      | 0-F             | 5                          | 0.415, 0.660, 0.694, 0.720, 0.749                                                                                                                                                                                                                                                                                                       | 0.694        | 7,010   | 5,720   | 5  | 1    | 2   | 9     | 8   | 3  |
| 40      | 3-R             | 5                          | 0.397, 0.440, 0.698, 0.750, 1.010                                                                                                                                                                                                                                                                                                       | 0.698        | 4,310   | 3,576   | 3  | 6    | 6   | 7     | 3   | 2  |
| 41      | 3-M             | 4                          | 0.221, 0.329, 1.105, 1.411                                                                                                                                                                                                                                                                                                              | 0.717        | 5,815   | 4,877   | 0  | 1    | 0   | 4     | 2   | 0  |
| 42      | 2-N             | 3                          | 0.560, 0.934, 0.960                                                                                                                                                                                                                                                                                                                     | 0.934        | 8,341   | 8,342   | 7  | 10   | 4   | 10    | 8   | 2  |
| Total   |                 | 153                        |                                                                                                                                                                                                                                                                                                                                         |              | 256,970 | 233,959 | 85 | 90   | 144 | 122   | 122 | 51 |

Data from Wu et al. 1989; Chen et al. 1992

Source: National Research Council (1999). Arsenic in Drinking Water. Washington, DC: National Academy Press, p 308-09 (corrected).
